# Supplementary material for: Multi-angle aerosol optical depth retrieval method based on improved surface reflectance
Source: Copernicus journal article supplement (doi:10.5194/amt-2023-204), 2023-11-22
Supplement: Supplementary file [file amt-2023-204-AC1-supplement.pdf]

## **Response to the reviewers' comments**

We are very grateful to the editor and reviewer for providing constructive comments on our manuscript and for giving us the opportunity to revise the manuscript. We have carefully considered the reviewers' comments and revised the manuscript accordingly. The responses to the comments or suggestions are shown below. Comments are shown in black font and **our responses are shown in blue font.**

### **Reviewer(s) Comments:**

#### **Reviewer #3**

##### **General comments:**

The authors improve upon their own prior work to estimate the surface reflectance from MISR measurements, and then use the improved estimate in conjunction with a look-up table-based approach to obtain a new aerosol optical depth product. They validate their product with AERONET measurements. They contend that the new product agrees well with AERONET data and has a higher spatial resolution and fewer missing pixels than the MODIS product.

There are a number of major flaws in the manuscript. The new methodology is not explained clearly. The description is convoluted and the novelty is not obvious. While the new product does have less missing pixels than the MODIS product, the improvement compared to existing products seems to be marginal. In my opinion, the authors need to do a significant amount of work to make this suitable for publication in AMT. For this reason, I would recommend rejection of the manuscript as currently written.

**Response:** We thank the reviewer for providing valuable and thought-provoking comments. We apologize for the poor language of our manuscript. Actually, we worked on the manuscript for a

long time and the repeated addition and removal of sentences and sections obviously led to poor readability. We have now worked on both language and readability. We really hope that the flow and language level have been substantially improved. In addition, we have revised and improved the manuscript where it was not clearly presented.

**Main comments:**

1. Sections 2.1 and 2.2: There is information overload here. The authorize should summarize in one or two paragraphs exactly what information is used and from what datasets.

**Response:** We have recognized the issue of information overload in Sections 2.1 and 2.2. In order to enhance readability and clarity, we have made revisions. We have accurately summarized the information used and the sources of the datasets in one or two paragraphs. (Section 2 )

2. Section 3.1: The description here is very confusing and hard to follow.

**Response:** We deeply apologize for any inconvenience caused by this. We have made logical adjustments and simplifications to the sentences in Section 3.1 to facilitate better understanding and readability for the reviewers. The specific modifications are as follows:

“ The accurate estimation of surface reflectance is a crucial and challenging aspect in the retrieval of AOD from satellite remote sensing data (Remer et al., 2009; Gupta et al., 2016). Previous research has identified the variation patterns of 9-angle MISR AOD (Chen et al., 2021). However, the AOD retrieved at 9 angles exhibits relatively large errors when compared to AERONET AOD (Table S3). Atmospheric correction can eliminate the effects of clouds and aerosols on data, obtaining the true surface reflectance. When using the 6S model to calculate atmospheric correction reflectance for the MISR sensor, several parameters need to be inputted,

including geometric parameters, AOD, water vapor, ozone, altitude, and radiation data, etc. In this study, we inputted the MISR geometric parameters and radiation data corresponding to Taihu and Xuzhou-CUMT stations, while the AOD parameter inputted was the AERONET AOD for these two stations. Through the generated linear atmospheric correction formula, we calculated the atmospheric correction reflectance for each pixel. To investigate the reasons for the higher AOD values retrieved from the 9 MISR angles, this study compared the MISR atmospheric correction reflectance and MISR surface reflectance at the pixel location (Figure 1) (MISR surface reflectance calculation method referenced Chen et al. (2021)). It was observed that the MISR surface reflectance was relatively lower compared to the MISR atmospheric correction reflectance. As a result, the retrieved MISR AOD values were higher compared to AERONET AOD. Therefore, it is necessary to establish a correction model to adjust the MISR surface reflectance and improve the retrieval accuracy of MISR AOD. ”

3. Section 3.2: On the other hand, there needs to be more detail here about how exactly the surface reflection is corrected to account for atmospheric effects as that is critical to the topic addressed by the authors. How exactly is the 6S model used for the atmospheric correction step a? More details need to be provided here, such as how atmospheric parameters relevant to the RT calculation (gas absorption? Aerosol optical depth? Aerosol layer height? Surface BRDF model?) are chosen.

**Response:** We apologize for not providing detailed explanations regarding the atmospheric correction process. In our manuscript, we have included an explanation of how the 6S model is

used to perform atmospheric correction on MODIS radiance data. The following is a detailed explanation:

“ When using the 6S model to calculate the atmospheric correction reflectance of the MODIS sensor, several parameters need to be provided. These parameters include geometric parameters, AOD, atmospheric models, aerosol types, sensor radiance data, sensor altitude, and spectral parameters. In this study, we inputted the MODIS geometric parameters and radiance data corresponding to the Taihu and Xuzhou-CUMT sites. The AOD parameter was obtained from the AERONET AOD data measured at these two sites. The atmospheric models chosen were mid-latitude winter and mid-latitude summer to account for seasonal variations in atmospheric transmission. The aerosol type selected was continental aerosol since it is typically found in the Yangtze River Delta region. The sensor altitude was set to the height of satellite observations. The spectral parameters were defined based on the wavelength bands of the MODIS sensor. By providing these parameters, we can utilize the 6S model to calculate the atmospheric correction reflectance of the MODIS sensor. ”

4. In Equation (1), how are the MISR and MODIS BRDF obtained?

**Response:** We apologize for not providing a description of how MISR and MODIS BRDF were obtained. Below is a detailed explanation:

“ We utilized the MODIS BRDF/Albedo product MCD43A1 data and employed the Ross-Li model to simulate surface bidirectional reflectance under MODIS and MISR observation geometries. The linear kernel-driven BRDF model comprises three essential parameters: the

nadir-view reflectance, and the weighting coefficients for the two kernel functions. The model can be expressed using the following formula:

$$BRDF(\theta_s, \theta_v, \phi) = f_{iso}(\Lambda) + f_{vol}(\Lambda)K_{vol}(\theta_s, \theta_v, \phi) + f_{geo}(\Lambda)K_{geo}(\theta_s, \theta_v, \phi) \quad (1)$$

$$K_{vol}(\theta_s, \theta_v, \phi) = \frac{(\pi/2 - \xi) \cos \xi + \sin \xi}{\cos \theta_s + \cos \theta_v} - \frac{\pi}{4} \quad (2)$$

$$K_{geo}(\theta_s, \theta_v, \phi) = O(\theta_s, \theta_v, \phi) - \sec \theta'_s - \sec \theta'_v + \frac{1}{2}(1 + \cos \xi') \sec \theta'_s \sec \theta'_v \quad (3)$$

$$O(\theta_s, \theta_v, \phi) = \frac{1}{\pi}(t - \sin t \cos t)(\sec \theta'_s + \sec \theta'_v) \quad (4)$$

$$\cos t = \frac{h}{b} \frac{\sqrt{D^2 + (\tan \theta'_s \tan \theta'_v \sin \phi)^2}}{\sec \theta'_s + \sec \theta'_v} \quad (5)$$

$$D = \sqrt{\tan^2 \theta'_s + \tan^2 \theta'_v - 2 \tan \theta'_s \tan \theta'_v \cos \phi} \quad (6)$$

$$\cos \xi' = \cos \theta'_s \cos \theta'_v + \sin \theta'_s \sin \theta'_v \cos \phi \quad (7)$$

$$\theta'_s = \tan^{-1}\left(\frac{b}{r} \tan \theta_s\right) \quad (8)$$

$$\theta'_v = \tan^{-1}\left(\frac{b}{r} \tan \theta_v\right) \quad (9)$$

In the aforementioned equation,  $BRDF(\theta_s, \theta_v, \phi)$  represents the bidirectional reflectance of the surface, while  $\theta_s$ ,  $\theta_v$ , and  $\phi$  denote the solar zenith angle, view zenith angle, and relative azimuth angle, respectively.  $\Lambda$  stands for the bandwidth, while  $K_{vol}(\theta_s, \theta_v, \phi)$  and  $K_{geo}(\theta_s, \theta_v, \phi)$  represent the volumetric scattering kernel and geometric optical scattering kernel, respectively. These terms are all functions of the incident and viewing angles.  $f_{iso}$ ,  $f_{vol}$ , and  $f_{geo}$  correspond to the weights assigned to isotropic scattering, volumetric scattering, and

geometric optical scattering in the reflectance, which serve as coefficients for their respective kernel functions.  $\xi$  represents the scattering angle, while b, h, and r represent the vertical radius, horizontal radius, and height of the sphere's center, respectively. Based on empirical values, these three parameters can be considered as fixed values. Within the production process of MODIS BRDF model parameter products, the following relationships exist among these parameters:  $h/b=2$  and  $b/r=1$  (Schaaf et al., 1999). By utilizing extrapolation with kernel functions, the surface's bidirectional reflectance can be computed under arbitrary solar incident and satellite viewing directions using the aforementioned equation.”

5. Conceptually, what is the difference between the “MODIS surface reflectance at the MISR angle” and the “MISR surface reflectance” ?

**Response:** The MODIS surface reflectance at the MISR angle refers to the MODIS surface reflectance calculated based on the MISR observation angles. On the other hand, the MISR surface reflectance refers to the estimated reflectance of the MISR sensor itself.

6. Section 4.1: How do we know that the “improved” surface reflectance is more reflective of reality?

**Response:** The objective of atmospheric correction is to mitigate the influence of factors like clouds and aerosols on the data, thereby obtaining the true surface reflectance. The ultimate outcome of this process is the surface reflectance. Consequently, we compared the refined MISR surface reflectance with the reflectance obtained through atmospheric correction.

7. Figure 5 should be accompanied by a figure showing the results using the old surface reflectance data, so that the changes in the AOD results can be clearly seen.

**Response:** We would like to thank the reviewer for his/her valuable feedback. To prevent duplication, we have omitted the results of AOD obtained through the previous study's application of the older surface reflectance retrieval technique in our manuscript. These findings are available in the work by Chen et al. in 2021.

8. Figure 7: There is a lot of scatter in the results. I am not sure the new method is doing as good a job as the authors claim.

Figure 8: These results are better but there is still a fair bit of systematic bias compared to AERONET data.

**Response:** Based on Table 1, it is evident that the results from Figures 7 and 8 exhibit higher correlation and overall smaller relative deviations compared to the previous old retrieval results. The improved retrieval results have been validated against AERONET AOD, showing significant improvement in terms of correlation and deviation compared to the old retrieval results validated against AERONET AOD. Although there are still some systematic biases present, it is clear that the retrieval results have been improved.

9. Again, the old results should be overplotted to show the improvement.

**Response:** Thank you very much for the reviewer's comments. We compared the old retrieval results with the improved retrieval results at the corresponding positions of two sites in Table 1.

We found that the improved retrieval results exhibit better correlation and overall smaller relative deviations compared to the old retrieval results.

10. Figure 9: The comparison with MODIS is also not very good.

**Response:** In our previous work, we validated MODIS AOD products against AERONET AOD using scatter plots (Fig. 1). By comparing the results from the following figure with the improved retrieval results presented in this manuscript, it is clear that the improved retrieval results have higher correlation and smaller deviation compared to the retrieval results from MODIS AOD products. Therefore, we believe that the improved AOD yields better retrieval performance than the MODIS AOD.

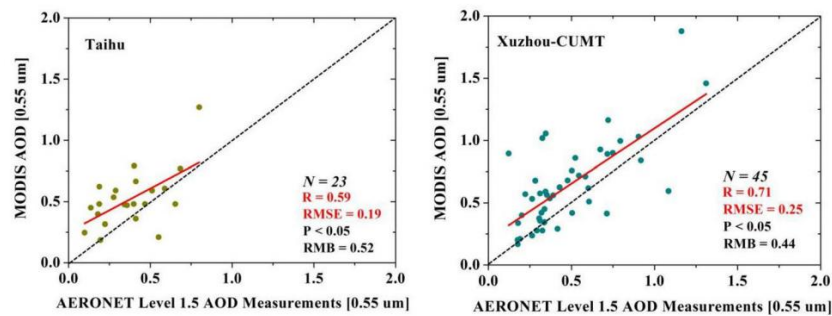

Fig. 1. MODIS AOD 550nm validation results for the corresponding locations at both sites. (Chen et al., 2021)

11. Table 1 is very confusing and there does not seem to be any explanatory description of the results therein.

**Response:** We apologize for not clearly explaining Table 1, and we have added an explanation of the contents to the manuscript. The details are as shown below:

“R represents the correlation between the old AOD retrieval results and AERONET AOD.

RMB represents the relative deviation between the old algorithm-retrieved AOD and AERONET



AOD. Improved R represents the correlation between the improved AOD retrieval results and AERONET AOD. Improved RMB represents the relative deviation between the AOD retrieved using the improved algorithm and AERONET AOD.”

**Technical comments:**

The paper is very poorly written and extremely hard to understand. There are grammatical and typo errors littered throughout the document. Here are some examples of awkwardly phrased sentences:

**Response:** We regret that there are grammatical and spelling errors as well as unclear expressions in the paper. We will carefully examine and correct these errors, and ensure that we pay more attention to grammar and spelling accuracy in future writing. Regarding the examples of awkward sentences you mentioned, we apologize for this. We will review these sentences and make modifications to improve their fluency and comprehensibility. We sincerely appreciate your valuable feedback, which is very helpful for us to improve the quality of the paper. We will closely consider your suggestions and take measures to ensure that future writing is more accurate, clear and easy to read.

12. Lines 115-116: 36 channels of MISR data are included, all of which can be retrieved for AOD.

**Response:** We have made language revisions to Section 2.1 and removed any unnecessary information to make the manuscript more accurate, clear, and readable.

13. Lines 164-165: Therefore, it can provide aerosol characterization parameters with high accuracy and validate the aerosol parameters from satellite retrievals

**Response:** We have revised the sentence as follows: "Therefore, AERONET provides high-precision aerosol characteristic parameters and can be used to validate satellite-retrieved AOD."

14. Lines 198-199: In 6S model, a series of parameters related to the simulated imaging date atmospheric conditions need to be input

**Response:** We have revised the sentence as follows: "When using the 6S model to calculate atmospheric correction reflectance for the MISR sensor, several parameters need to be inputted. "

15. Lines 257-258: Compare the improved AOD with the previously retrieved AOD, and analyze the accuracy and spatial distribution trend of the improved AOD.

**Response:** We have revised the sentence as follows: " We compared the improved AOD with the previously retrieved AOD and analyzed the accuracy and spatial distribution trends of the improved AOD. "

16. Line 124: Arcgis, ENVI not defined

**Response:** The full name of ArcGIS is "ArcGIS Geographic Information System" and the full name of ENVI is "Environment for Visualizing Images". These two software tools were used in our manuscript, and we have added relevant information about them in the corresponding sections.

17. Line 163: AOD values can be retrieval -> AOD values can be retrieved; an retrieval error -> a retrieval error

**Response:** We deeply apologize for the language errors found in the paper. We have carefully checked and corrected these errors.
